# Supplementary material for: Embedding Active Pedagogies into Pre-Service Teacher Education: Implementation Considerations and Recommendations
Source: Research Square preprint supplement (doi:10.21203/rs.3.rs-87074/v1), 2020-10-08
Supplement: Supplementary file 1 [file 1da1d97f6a793173409971d1.docx]

***Additional file 5****:* Results from linear mixed models used to assess the intervention effects on factors associated with successful implementation of active pedagogic strategies in pre-service teachers.

<https://deakin365.sharepoint.com/sites/Transform-Ed/Shared%20Documents/General/Effectiveness%20results%20pre-service%20teachers/Table%20mixed%20models.htm>
